# Supplementary material for: The metabolomic signature of extreme longevity: naked mole rats versus mice
Source: publisher site journal article supplement (doi:10.18632/aging.102116), 2019-07-24
Supplement: Supplementary file [file aging-v11i14-102116-supplementary-material-SD1.pdf]

SUPPLEMENTARY FIGURES

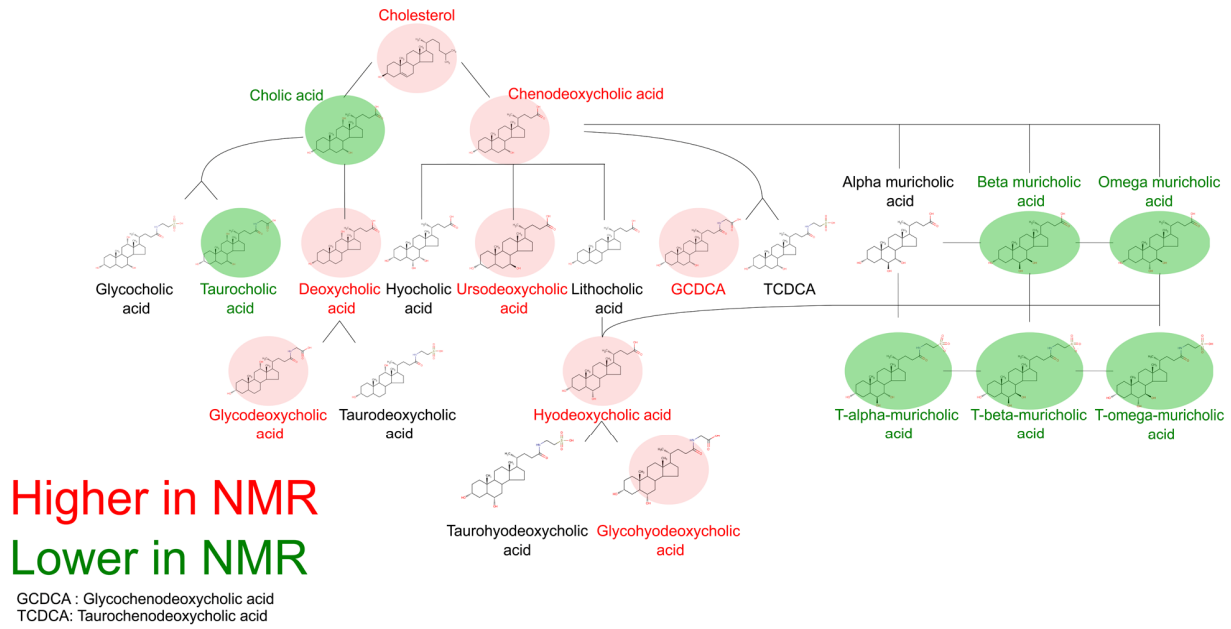

**Supplementary Figure 1. Schematic overview of interspecies differences in bile acid metabolism.** Note that molecular species that are more abundant in naked mole-rats are marked with pink backgrounds, while molecules that are more abundant in mice are marked in green.

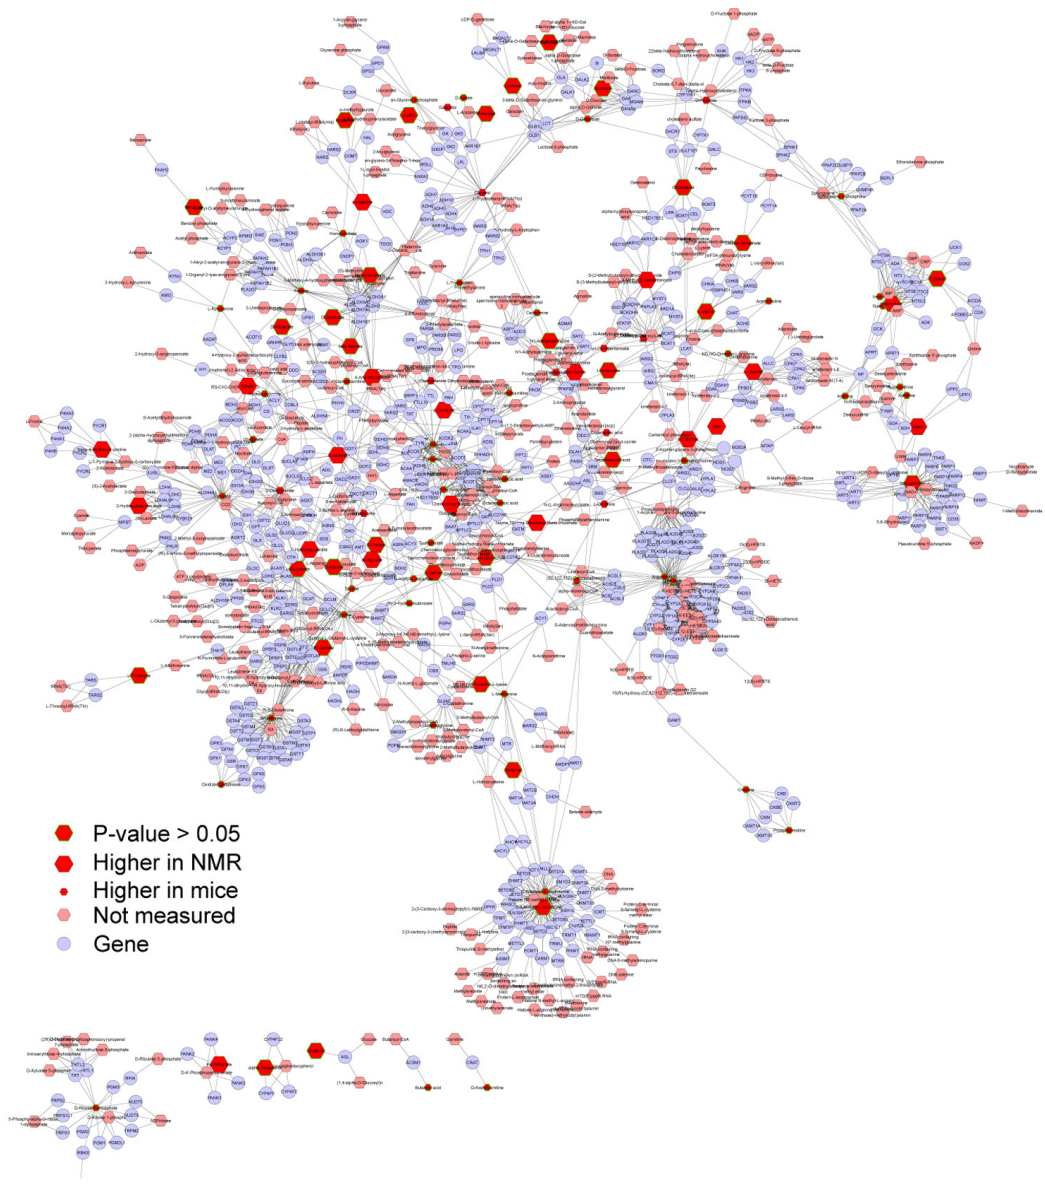

**Supplementary Figure 2.** Pathway analysis was processed with Metscape app v3.1.3 from Cytoscape software v3.7.1 (ref <http://cytoscape.org>). Fold-changes were calculated by dividing means of groups. P-values were obtained by means of the two-sided Wilcoxon test.

### Enrichment Overview (top 50)

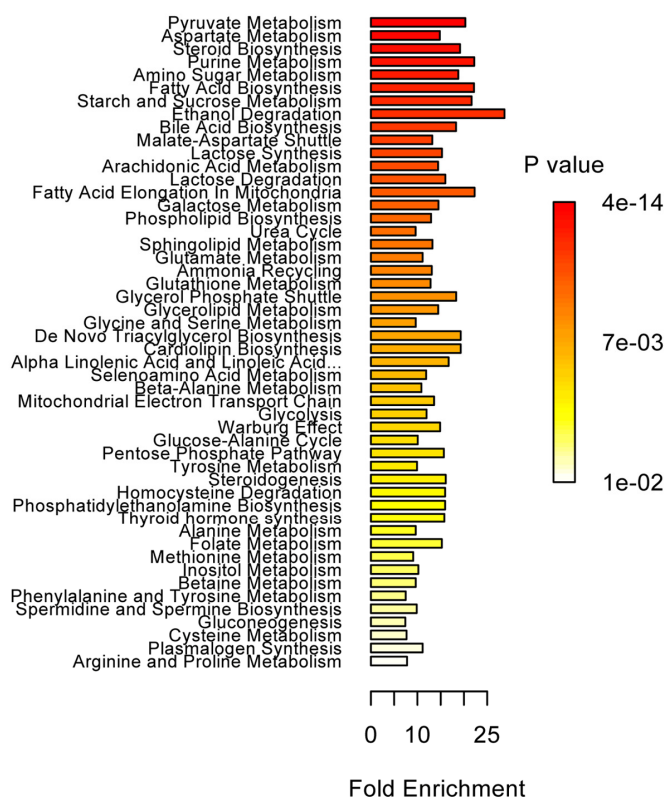

**Supplementary Figure 3. Quantitative enrichment analysis was processed with MetaboAnalyst 4.0 (<https://www.metaboanalyst.ca/>).** Data were log-transformed and mean-centered. SMPDB pathway-associated metabolite sets was used, with a threshold of 3 compounds minimum per pathway.
