# Supplementary material for: The metabolomic signature of extreme longevity: naked mole rats versus mice
Source: Aging (Albany NY). 2019 Jul 24;11(14):4783–800. doi: 10.18632/aging.102116 (PMC6682510; doi:10.18632/aging.102116)
Supplement: Supplementary Table 1 [file aging-11-102116-s001.xlsx]

## Sheet: Feuil1
	Upregulated analytes in NMR	Fold Changes	p-values
	Hyodeoxycholic acid	-6.78876	2.73677e-10
	Glycohyodeoxycholic acid	-6.69957	2.73677e-10
	Glycochenodeoxycholic acid	-3.72462	3.31423e-07
	Sucrose	-3.5815	3.31423e-07
	Glycodeoxycholic acid	-3.47375	2.73677e-10
	Maltose;Trehalose	-3.44227	2.73677e-10
	Ursodeoxycholic acid	-2.90719	1.2206e-06
	Raffinose	-2.52935	5.33671e-08
	Hippuric acid	-2.49399	1.36026e-05
	N1,N8-diacetylspermidine	-2.41839	1.23155e-08
	Tetradecanedioic acid	-2.33447	2.73677e-10
	Aspartic acid	-2.29346	8.21032e-09
	Hexadecanedioic acid	-2.29237	2.73677e-10
	Chenodeoxycholic acid	-2.19964	0.0770816
	Glutamic acid	-1.87436	9.52124e-07
	Serine	-1.78744	2.91272e-05
	Trimethyl-lysine	-1.50355	2.41972e-05
	N8-acetylspermidine	-1.39329	1.2206e-06
	Alanine	-1.32077	1.2206e-06
	Creatinine	-1.30995	2.73677e-10
	PCae(22:4)	-1.27576	2.91272e-05
	Lactose	-1.25669	4.99111e-05
	Adenosine;2-deoxyguanosine	-1.07041	0.00039343
	Choline phosphate	-1.04987	0.0111517
	Dodecanedioic acid	-1.03872	2.73677e-10
	Cholesterol	-0.997548	1.11515e-05
	Niacinamide	-0.926077	0.00117
	Azelaic acid	-0.835105	1.91574e-09
	Valine	-0.806403	0.00217992
	S-adenosylhomocysteine	-0.787723	0.000217391
	Alpha-tocopherol	-0.772176	4.99111e-05
	Threonine	-0.771169	0.00435883
	Leucylproline	-0.691523	0.0196295
	Isoleucine	-0.679829	0.0234626
	Hexanoylglycine*	-0.677001	0.00276365
	Leucine	-0.661931	0.0533197
	Lactic acid	-0.644465	2.48581e-06
	Glyceric acid	-0.572063	0.000453937
	Methylmalonic acid	-0.551672	0.0163411
	Malonylcarnitine	-0.53344	0.144124
	Xylitol	-0.525987	0.0358839
	Heptadecatrienoic acid	-0.464436	0.0196295
	Deoxycholic acid	-0.0995106	0.625833
	Cadaverine	0.104421	9.84251e-05
	Downregulated analytes in NMR	Fold Change	p-values
	Xanthine	10.9071	5.47355e-10
	Inosine	9.51708	6.15774e-10
	Taurocholic acid	9.38317	2.73677e-10
	Hypoxanthine	9.00352	5.47355e-10
	Tauro-alpha-muricholic acid;Tauro-beta-muricholic acid;Tauro-omega-muricholic acid	8.27367	2.73677e-10
	Cholic acid	7.86125	2.73677e-10
	Guanosine	5.96985	2.44257e-08
	Beta-muricholic acid	5.43259	3.80412e-08
	PCae(20:0)	4.97142	2.73677e-10
	Indole-3-acrylic acid	4.8724	1.09471e-09
	PCae(22:6)	4.83498	2.73677e-10
	Carnitine C14:2	4.63082	3.48939e-09
	Ribose-5-phosphate;Ribulose-5-phosphate	3.96687	3.38471e-07
	PCae(16:0)	3.86463	2.73677e-10
	Gamma-glutamyltyrosine	3.67751	2.73677e-10
	PCae(20:1)	3.4711	2.73677e-10
	PCae(16:1)	3.44374	2.73677e-10
	PCae(18:2)	3.3932	2.73677e-10
	Docosahexaenoic acid	3.34603	2.73677e-10
	Carnitine C14:1(OH)	3.33281	2.73677e-10
	PCee(16:0)	3.29691	2.73677e-10
	PCae(20:4)	3.27664	2.73677e-10
	Carnitine C4:0(OH)	3.157	2.73677e-10
	Indole-3-propionic acid	3.10809	0.000252968
	5-aminovaleric acid	2.73624	5.47355e-10
	PCae(18:1)	2.73068	2.73677e-10
	PCae(18:3)	2.71392	2.73677e-10
	Acetic acid	2.62051	2.73677e-10
	Dimethylglycine	2.60907	2.73677e-10
	PCae(20:2)	2.5917	1.09471e-09
	Gamma-glutamylleucine	2.53299	2.73677e-10
	2-hydroxy-3-methylbutyric acid	2.44459	2.73677e-10
	PCae(20:3)	2.33943	2.73677e-10
	Hydroxyphenyllactic acid*	2.2572	3.48939e-09
	Gamma-glutamyllysine	2.21891	1.91574e-09
	Linoleic acid	2.20696	2.73677e-10
	2-hydroxy-2-methylbutyric acid	2.13284	5.47355e-10
	S-adenosylmethionine	2.10152	7.44403e-08
	Carnitine C12:0	2.0925	1.09471e-09
	Carnitine C6:0	2.04438	5.47355e-10
	Nonadecanoic acid	1.90783	2.73677e-10
	3-hydroxybutyric acid	1.89516	1.91574e-09
	Dodecenoic acid	1.87319	5.47355e-10
	PCae(18:0)	1.74646	2.73677e-10
	Palmitoleic acid	1.7014	2.73677e-10
	Tetradecadienoic acid	1.666	3.28413e-09
	Phosphocreatine	1.63775	1.55476e-06
	PCae(17:0)	1.61856	2.73677e-10
	Nonadecenoic acid	1.59786	2.73677e-10
	PCae(15:0)	1.55546	2.73677e-10
	Carnitine C10:0	1.55506	0.000546247
	Homovanillic acid	1.51523	2.73677e-10
	Carnitine C10:1	1.50603	1.72417e-08
	Sphingosine-1-phosphate	1.5045	1.09471e-09
	Eicosenoic acid	1.46857	1.91574e-09
	Oleic acid;Elaidic acid;Vaccenic acid	1.43833	2.73677e-10
	Glycerol-3-phosphate	1.35926	1.87195e-07
	Arachidonic acid	1.33924	5.19987e-09
	Carnitine C8:0	1.29434	4.12569e-08
	Heptadecenoic acid	1.21998	3.28413e-09
	Taurine	1.1484	2.73677e-10
	Acetylcarnitine	1.07107	1.91574e-09
	Ox. glutathione	0.857192	0.00603828
